# Supplementary material
Source: PubMed Central journal article supplement (PMC9258752)

# Emmanuela Gakidou

Jan 04, 2022 10:37:14 EST  
New England Journal of Medicine - Solicited Submission Disclosures

**Disclosure Purpose:** 21-06441

## Summary of Interests

I do not have any interests to disclose at this time.

## Certification

I certify that the information provided in this disclosure is complete and accurate.

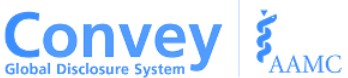

# Heidi Larson

Feb 06, 2022 12:17:02 EST  
New England Journal of Medicine - Solicited Submission Disclosures

**Disclosure Purpose:** 21-06441

## Summary of Interests

**Company or Organization**

| Entity              | Type             | Interest Held By |
|---------------------|------------------|------------------|
| <a href="#">GSK</a> | Grant / Contract | Self             |

*Recipient Name:* Heidi Larson  
*Grant / Contract Description:* Organizing and presenting in training sessions on vaccine hesitancy  
*Additional Information:*

*Recipient Type:* Individual  
*Grant / Contract Purpose:* Other - training sessions

## Certification

I certify that the information provided in this disclosure is complete and accurate.

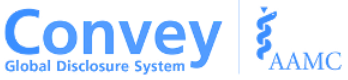

# Christopher Murray

Jan 04, 2022 12:16:58 EST  
New England Journal of Medicine - Solicited Submission Disclosures

**Disclosure Purpose:** 21-06441

## Summary of Interests

I do not have any interests to disclose at this time.

## Certification

I certify that the information provided in this disclosure is complete and accurate.



Supplement: NEJMra2106441_disclosures.pdf [file NEJMra2106441_disclosures.pdf]
